# Supplementary material
Source: PubMed Central journal article supplement (PMC2678167)
Supplement: NIHMS58694-supplement-Appendix.pdf [file NIHMS58694-supplement-Appendix.pdf]

**Table 1. Meeting participants**

---

|                             |                                                      |
|-----------------------------|------------------------------------------------------|
| Kenneth Aldape, MD          | MD Anderson Cancer Center, Houston, TX               |
| Robert Bachoo, MD, PhD      | University of Texas - Southwestern, Dallas, TX       |
| Suzanne Baker, PhD          | St. Jude Children's Research Hospital, Memphis, TN   |
| Monique Barakat, MD, PhD    | Stanford University, Palo Alto, CA                   |
| Alain Charest, PhD          | Tufts - New England Medical Center, Boston, MA       |
| Charles Eberhart, MD, PhD   | Johns Hopkins Medical School, Baltimore, MD          |
| Mark Ellisman, PhD          | University of California - San Diego, CA             |
| Daniel Fults III, MD        | University of Utah, Salt Lake City, UT               |
| Joel Garbow, PhD            | Washington University, St Louis, MO                  |
| Richard Gilbertson, MD, PhD | St. Jude Children's Research Hospital, Memphis, TN   |
| Marco Giovannini, MD, PhD   | INSERM/House Ear Institute, Los Angeles, CA          |
| Abhijit Guha, MD            | University of Toronto, Ontario, Canada               |
| David Gutmann, MD, PhD      | Washington University, St Louis, MO                  |
| Mark Henkelman, PhD         | University of Toronto, Ontario, Canada               |
| Eric Holland, MD, PhD       | Memorial Sloan Kettering Cancer Center, NY, NY       |
| C. David James, PhD         | University of California - San Francisco, CA         |
| Keith Ligon, MD, PhD        | Dana Farber Cancer Institute, Boston, MA             |
| Elizabeth Maher, MD, PhD    | University of Texas - Southwestern, Dallas, TX       |
| Mary Ann Martone, PhD       | University of California - San Diego, CA             |
| Silvia Marino, MD           | Barts and London School, London, England             |
| Duanne Mitchell, MD, PhD    | Duke University, Durham, NC                          |
| John Olhfest, PhD           | University of Minnesota, Minneapolis, MN             |
| Luis Parada, PhD            | University of Texas - Southwestern, Dallas, TX       |
| Arie Perry, MD              | Washington University, St Louis, MO                  |
| Karlyne Reilly, PhD         | National Cancer Institute, Frederick, MD             |
| Martine Roussel, PhD        | St. Jude Children's Research Hospital, Memphis, TN   |
| David Rowitch, MD, PhD      | University of California - San Francisco             |
| Joshua Rubin, MD, PhD       | Washington University, St Louis, MO                  |
| Charles Stiles, PhD         | Dana Farber Cancer Institute, Boston, MA             |
| Daniel Turnbull, PhD        | Skirball Institute, NYU Medical Center, New York, NY |
| Terry Van Dyke, PhD         | NCI, Frederick, MD/UNC, Chapel Hill, NC              |
| Robert Wechsler-Reya, PhD   | Duke University, Durham, NC                          |
| William Weiss, MD, PhD      | University of California - San Francisco, CA         |
| Bengt Westermark, PhD       | Ludwig Institute, Uppsala, Sweden                    |
| Cynthia Wetmore, MD         | Mayo Clinic, Rochester, MN                           |
| Robert Williams, PhD        | University of Tennessee - Memphis, TN                |
| W.K. Alfred Yung, MD        | MD Anderson Cancer Center, Houston, TX               |
| Yuan Zhu, PhD               | University of Michigan, Ann Arbor, MI                |
